# Supplementary material for: Do Urban Hedgehogs (Erinaceus europaeus) Represent a Relevant Source of Zoonotic Diseases?
Source: MDPI journal article supplement (doi:10.3390/pathogens12020268), 2023-02-07
Supplement: s1 [file s1]

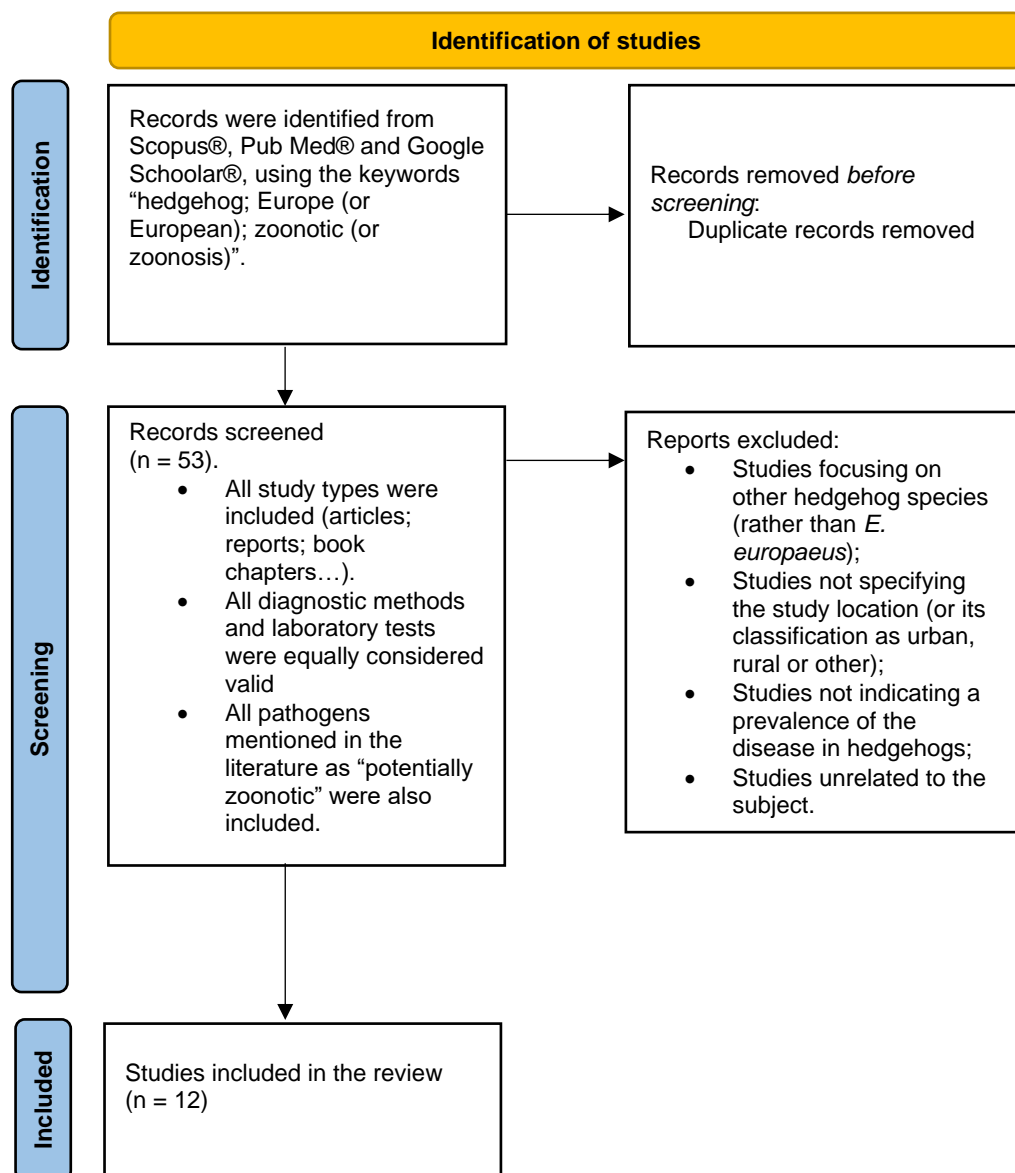

**Figure S1: Flow diagram for “Do urban hedgehogs (*Erinaceus europaeus*) represent a relevant source of zoonotic diseases?”**

Diagram designed based on: Page MJ, McKenzie JE, Bossuyt PM, Boutron I, Hoffmann TC, Mulrow CD, et al. The PRISMA 2020 statement: an updated guideline for reporting systematic reviews. BMJ 2021;372:n71. doi: 10.1136/bmj.n71
